# Supplementary material for: Relationships of Fat and Muscle Mass with Chronic Kidney Disease in Older Adults: A Cross-Sectional Pilot Study
Source: PubMed Central journal article supplement (PMC7731281; doi:10.3390/ijerph17239124), 2020-12-07
Supplement: ijerph-17-09124-s001.pdf [file ijerph-17-09124-s001.pdf]

## Supplementary

**Table S1.** Average values of eGFR and body composition parameters according to body composition quartile.

| <b>LM</b>                         |                                           |                               |
|-----------------------------------|-------------------------------------------|-------------------------------|
|                                   | Average value of LM (kg)                  | Average value of eGFR (mg/dL) |
| The lowest quartile (n =70)       | 32.5                                      | 54.4                          |
| The low-middle quartile (n = 52)  | 35.0                                      | 55.0                          |
| The middle-high quartile (n = 56) | 37.7                                      | 55.0                          |
| The highest quartile (n = 58)     | 44.3                                      | 66.7                          |
| <b>ASM</b>                        |                                           |                               |
|                                   | Average value of ASM (kg)                 | Average value of eGFR (mg/dL) |
| The lowest quartile (n = 64)      | 12.2                                      | 53.5                          |
| The low-middle quartile (n = 54)  | 14.2                                      | 53.8                          |
| The middle-high quartile (n = 60) | 15.6                                      | 54.8                          |
| The highest quartile (n = 58)     | 19.8                                      | 68.9                          |
| <b>MMI</b>                        |                                           |                               |
|                                   | Average value of MMI (kg/m <sup>2</sup> ) | Average value of eGFR (mg/dL) |
| The lowest quartile (n = 64)      | 5.5                                       | 53.5                          |
| The low-middle quartile (n =54)   | 6.1                                       | 53.8                          |
| The middle-high quartile (n = 60) | 6.4                                       | 54.8                          |
| The highest quartile (n =58)      | 7.4                                       | 68.9                          |
| <b>%MMI</b>                       |                                           |                               |
|                                   | Average value of %MMI (%)                 | Average value of eGFR (mg/dL) |
| The lowest quartile (n = 58)      | 21.7                                      | 52.7                          |
| The low-middle quartile (n = 60)  | 24.0                                      | 55.4                          |
| The middle-high quartile (n =58)  | 26.2                                      | 55.4                          |
| The highest quartile (n = 60)     | 31.1                                      | 67.4                          |
| <b>%FM</b>                        |                                           |                               |
|                                   | Average value of %FM (%)                  | Average value of eGFR (mg/dL) |
| The lowest quartile (n = 58)      | 27.7                                      | 62.6                          |
| The low-middle quartile (n = 59)  | 35.9                                      | 60.8                          |
| The middle-high quartile (n = 58) | 40.6                                      | 53.7                          |
| The highest quartile (n = 61)     | 46.7                                      | 53.5                          |
